# Supplementary material
Source: PubMed Central journal article supplement (PMC6248140)

## Supplementary Online Content

Foster DG, Biggs MA, Raifman S, Gipson J, Kimport K, Rocca CH. Comparison of Health, Development, Maternal Bonding, and Poverty Among Children Born After Denial of Abortion vs After Pregnancies Subsequent to an Abortion. *JAMA Pediatr*. Published online September 04, 2018. doi:10.1001/jamapediatrics.2018.1785

Supplement. eTable. Sensitivity Analyses: Outcomes of Children Born From a Denied Abortion Compared With Those Born to Women Subsequent to Receiving an Abortion

eFigure. Study Flow

This supplementary material has been provided by the authors to give readers additional information about their work.

**eTable.** Sensitivity Analyses: Outcomes of Children Born From a Denied Abortion Compared With Those Born to Women Subsequent to Receiving an Abortion

|                                                                   |                                                   |                                               | Main model      |                         | Further adjustment for confounding |                         | Reference group Near limits rather than all abortion |                         |
|-------------------------------------------------------------------|---------------------------------------------------|-----------------------------------------------|-----------------|-------------------------|------------------------------------|-------------------------|------------------------------------------------------|-------------------------|
|                                                                   |                                                   | Adjusted odds ratio or regression coefficient | Effect estimate | 95% Confidence Interval | Effect estimate                    | 95% Confidence Interval | Effect estimate                                      | 95% Confidence Interval |
| <b>Perinatal, one observation per child</b>                       |                                                   |                                               |                 |                         |                                    |                         |                                                      |                         |
|                                                                   | Low birth weight                                  | aOR                                           | 0.50            | [0.20, 1.27]            | 0.56                               | [0.21, 1.45]            | 0.63                                                 | [0.22, 1.85]            |
|                                                                   | Premature                                         | aOR                                           | 0.45            | [0.19, 1.07]            | 0.48                               | [0.20, 1.18]            | 0.44                                                 | [0.17, 1.15]            |
|                                                                   | Healthy at birth                                  | aOR                                           | 1.08            | [0.33, 3.56]            | 1.01                               | [0.30, 3.39]            | 0.87                                                 | [0.17, 4.44]            |
|                                                                   | Short birth interval                              | aOR                                           | 5.87            | [2.33, 14.80]           | 7.34                               | [2.80, 19.21]           | 5.54                                                 | [1.86, 16.49]           |
|                                                                   | Spent any time in NICU                            | aOR                                           | 0.96            | [0.45, 2.01]            | 0.93                               | [0.44, 2.00]            | 1.07                                                 | [0.45, 2.56]            |
| <b>Child health</b>                                               |                                                   |                                               |                 |                         |                                    |                         |                                                      |                         |
|                                                                   | Physical disability, past 6 months                | aOR                                           | 2.64            | [0.48, 14.61]           | 2.50                               | [0.46, 13.45]           | 1.50                                                 | [0.26, 8.59]            |
|                                                                   | Injury, past 6 months                             | aOR                                           | 1.91            | [1.02, 3.59]            | 1.80                               | [0.96, 3.39]            | 1.57                                                 | [0.80, 3.07]            |
|                                                                   | Asthma                                            | aOR                                           | 1.23            | [0.15, 10.08]           | 1.46                               | [0.17, 12.64]           | 3.37                                                 | [0.22, 51.08]           |
|                                                                   | Breastfeeding, under age 6 months                 |                                               |                 |                         |                                    |                         |                                                      |                         |
|                                                                   | Any breastfeeding                                 | aOR                                           | 0.64            | [0.37, 1.09]            | 0.71                               | [0.41, 1.24]            | 0.85                                                 | [0.47, 1.56]            |
|                                                                   | Exclusive breastfeeding                           | aOR                                           | 1.23            | [0.61, 2.49]            | 1.28                               | [0.62, 2.63]            | 1.40                                                 | [0.63, 3.12]            |
| <b>Child development, based on PEDS: Developmental Milestones</b> |                                                   |                                               |                 |                         |                                    |                         |                                                      |                         |
|                                                                   | Fine motor                                        | aOR                                           | 0.72            | [0.48, 1.07]            | 0.72                               | [0.49, 1.08]            | 0.53                                                 | [0.33, 0.85]            |
|                                                                   | Self-help                                         | aOR                                           | 1.31            | [0.97, 1.75]            | 1.33                               | [0.99, 1.79]            | 1.36                                                 | [0.98, 1.89]            |
|                                                                   | Receptive language                                | aOR                                           | 1.35            | [0.99, 1.82]            | 1.37                               | [1.01, 1.86]            | 1.47                                                 | [1.05, 2.04]            |
|                                                                   | Gross motor                                       | aOR                                           | 0.66            | [0.49, 0.88]            | 0.67                               | [0.50, 0.90]            | 0.62                                                 | [0.44, 0.88]            |
|                                                                   | Social emotional                                  | aOR                                           | 0.88            | [0.61, 1.28]            | 0.91                               | [0.63, 1.32]            | 0.84                                                 | [0.55, 1.29]            |
|                                                                   | Expressive language                               | aOR                                           | 0.81            | [0.51, 1.27]            | 0.82                               | [0.52, 1.29]            | 0.68                                                 | [0.40, 1.15]            |
|                                                                   | Overall percentage                                | aCoef.                                        | -0.01           | [-0.03, 0.01]           | -0.01                              | [-0.03, 0.01]           | -0.01                                                | [-0.04, 0.01]           |
| <b>Maternal bonding (under 18 months)</b>                         |                                                   |                                               |                 |                         |                                    |                         |                                                      |                         |
|                                                                   | Postpartum Bonding Questionnaire (PBQ), mean (SD) | coef.                                         | 1.34            | [0.48, 2.19]            | 1.49                               | [0.64, 2.34]            | 1.31                                                 | [0.37, 2.25]            |
|                                                                   | Poor maternal bonding                             | aOR                                           | 5.14            | [1.48, 17.85]           | 5.83                               | [1.67, 20.33]           | 5.06                                                 | [1.30, 19.69]           |

| <b>Socioeconomics and household structure</b>                                                                                                                                                                                                                                                                                                                                                                                                                                                                                                                                                                                                                                                                                                                                                                                                                                                                                                                                                                                     |        |       |                |       |                |       |               |  |
|-----------------------------------------------------------------------------------------------------------------------------------------------------------------------------------------------------------------------------------------------------------------------------------------------------------------------------------------------------------------------------------------------------------------------------------------------------------------------------------------------------------------------------------------------------------------------------------------------------------------------------------------------------------------------------------------------------------------------------------------------------------------------------------------------------------------------------------------------------------------------------------------------------------------------------------------------------------------------------------------------------------------------------------|--------|-------|----------------|-------|----------------|-------|---------------|--|
| Child lives with mother                                                                                                                                                                                                                                                                                                                                                                                                                                                                                                                                                                                                                                                                                                                                                                                                                                                                                                                                                                                                           |        | N/A   | N/A            |       |                |       |               |  |
| Mother lives with a male partner                                                                                                                                                                                                                                                                                                                                                                                                                                                                                                                                                                                                                                                                                                                                                                                                                                                                                                                                                                                                  | aOR    | 0.22  | [0.09, 0.52]   | 0.27  | [0.12, 0.64]   | 0.24  | [0.09, 0.60]  |  |
| Mother lives with adult family members                                                                                                                                                                                                                                                                                                                                                                                                                                                                                                                                                                                                                                                                                                                                                                                                                                                                                                                                                                                            | aOR    | 5.35  | [2.16, 13.28]  | 4.14  | [1.70, 10.12]  | 4.63  | [1.73, 12.40] |  |
| Mother lives without family or male partner                                                                                                                                                                                                                                                                                                                                                                                                                                                                                                                                                                                                                                                                                                                                                                                                                                                                                                                                                                                       | aOR    | 1.32  | [0.60, 2.88]   | 1.34  | [0.61, 2.95]   | 1.21  | [0.50, 2.91]  |  |
| Public Assistance-WIC                                                                                                                                                                                                                                                                                                                                                                                                                                                                                                                                                                                                                                                                                                                                                                                                                                                                                                                                                                                                             | aOR    | 1.12  | [0.75, 1.67]   | 1.05  | [0.71, 1.55]   | 1.06  | [0.68, 1.65]  |  |
| Public Assistance-TANF                                                                                                                                                                                                                                                                                                                                                                                                                                                                                                                                                                                                                                                                                                                                                                                                                                                                                                                                                                                                            | aOR    | 1.57  | [0.68, 3.61]   | 1.37  | [0.60, 3.13]   | 1.35  | [0.54, 3.40]  |  |
| Public assistance-Food stamps                                                                                                                                                                                                                                                                                                                                                                                                                                                                                                                                                                                                                                                                                                                                                                                                                                                                                                                                                                                                     | aOR    | 0.93  | [0.53, 1.61]   | 0.82  | [0.48, 1.40]   | 0.68  | [0.37, 1.26]  |  |
| Household income below FPL                                                                                                                                                                                                                                                                                                                                                                                                                                                                                                                                                                                                                                                                                                                                                                                                                                                                                                                                                                                                        | aOR    | 1.82  | [0.94, 3.55]   | 1.31  | [0.69, 2.48]   | 1.95  | [0.92, 4.12]  |  |
| Not enough money to meet basic living needs                                                                                                                                                                                                                                                                                                                                                                                                                                                                                                                                                                                                                                                                                                                                                                                                                                                                                                                                                                                       | aOR    | 5.16  | [2.34, 11.40]  | 4.61  | [2.19, 9.71]   | 4.62  | [2.00, 10.66] |  |
| Percent of FPL, mean (SD)                                                                                                                                                                                                                                                                                                                                                                                                                                                                                                                                                                                                                                                                                                                                                                                                                                                                                                                                                                                                         | coeff. | -0.31 | [-0.52, -0.10] | -0.22 | [-0.42, -0.02] | -0.20 | [-0.43, 0.02] |  |
| <p>Models compare index children (reference) to children born subsequent to abortion, using mixed effects regression adjusting for covariates (maternal race/ethnicity, maternal age at time of recruitment, birth order (1 vs 2+), sex of child, and, except for perinatal outcomes, child's age at interview) and for clustering by child and site; Perinatal birth outcomes are based on one observation per child and include children placed for adoption. All other analyses, with the exception of child lives with mother, are based on multiple observations per child but exclude 15 index children placed for adoption; breastfeeding outcomes were limited to infants less than 6 months of age (317 observations) and maternal bonding to children under age 1.5 (836 observations); aOR=adjusted odds ratio; coeff.=regression coefficient; SD=Standard Deviation; WIC=Women, Infant, and Children Program; TANF=Temporary Assistance for Needy Families; FPL= Federal Poverty Level; poor bonding = PBQ&gt;11.</p> |        |       |                |       |                |       |               |  |

**eFigure. Study Flow**

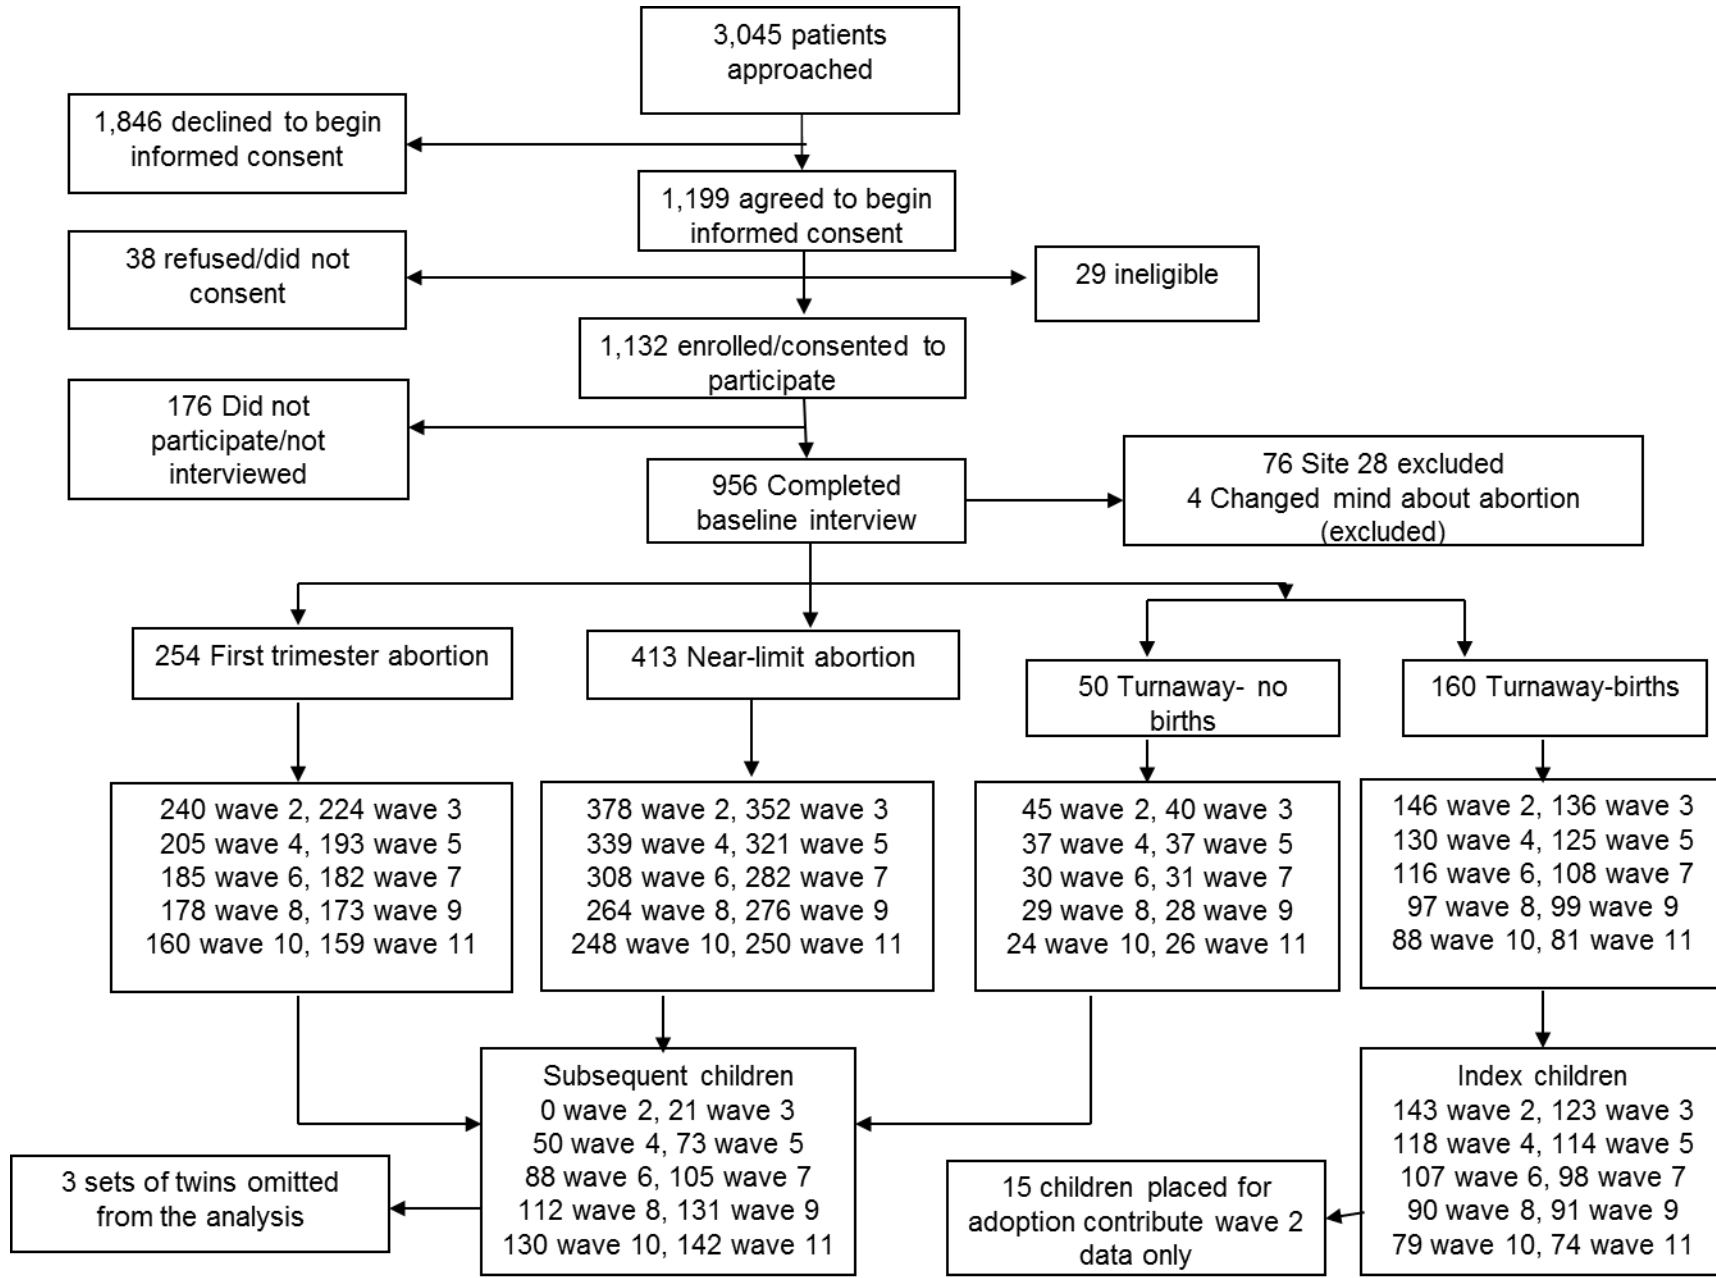

Supplement: jamapediatr-172-1053-s001.pdf [file jamapediatr-172-1053-s001.pdf]
